# Supplementary material for: Porcine Parvovirus 7: Evolutionary Dynamics and Identification of Epitopes toward Vaccine Design
Source: PubMed Central journal article supplement (PMC7565409; doi:10.3390/vaccines8030359), 2020-07-05
Supplement: vaccines-08-00359-s001.pdf [file vaccines-08-00359-s001.pdf]

**Table S1.** Detailed information of PPV7 strain sequences used in this study.

| GenBank Number | Strain Name        | Country | Year | Host       | Genome  | NS1     | Cap     |
|----------------|--------------------|---------|------|------------|---------|---------|---------|
| MK484102       | PPV7/China/AHhf    | China   | 2018 |            | 3999 bp | 2019 bp | 1425 bp |
| MK484101       | PPV7/China/AHmas   | China   | 2018 |            | 3999 bp | 2019 bp | 1425 bp |
| MK484100       | PPV7/China/AHbz    | China   | 2018 |            | 3999 bp | 2019 bp | 1425 bp |
| MK378411       | PPV7_VIRES_GZ02_C1 | China   | 2017 | Sus scrofa | 4036 bp | 2019 bp | 1425 bp |
| MH422967       | PPV7-KF6           | Korea   | 2017 |            | 3674 bp | 2019 bp | 1410 bp |
| MH422966       | PPV7-KF5           | Korea   | 2017 |            | 3656 bp | 2019 bp | 1392 bp |
| MH422965       | PPV7-KF4           | Korea   | 2017 |            | 3689 bp | 2019 bp | 1425 bp |
| MH422964       | PPV7-KF3           | Korea   | 2017 |            | 3668 bp | 2019 bp | 1404 bp |
| MH422963       | PPV7-KF2           | Korea   | 2017 |            | 3674 bp | 2019 bp | 1410 bp |
| MH422962       | PPV7-KF1           | Korea   | 2017 |            | 3689 bp | 2019 bp | 1425 bp |
| MG914435       | PPV7_SWE20         | Sweden  | 2016 |            | 4062 bp | 2019 bp | 1401 bp |
| MG543471       | GX49               | China   | 2015 |            | 3999 bp | 2019 bp | 1425 bp |
| MG543472       | GX50               | China   | 2015 |            | 3999 bp | 2019 bp | 1425 bp |
| MG543470       | GX47               | China   | 2015 |            | 3984 bp | 2019 bp | 1410 bp |
| MG543469       | GX48               | China   | 2015 |            | 3999 bp | 2019 bp | 1425 bp |
| MG543468       | GX45               | China   | 2015 |            | 3999 bp | 2019 bp | 1425 bp |
| MG543467       | GX44               | China   | 2015 |            | 3987 bp | 2019 bp | 1413 bp |
| MG543466       | GX35               | China   | 2015 |            | 3999 bp | 2019 bp | 1425 bp |
| MG543465       | GX34               | China   | 2015 |            | 3999 bp | 2019 bp | 1425 bp |
| MG543464       | GX32               | China   | 2015 |            | 3999 bp | 2019 bp | 1425 bp |
| MG543463       | GX31               | China   | 2015 |            | 3999 bp | 2019 bp | 1425 bp |
| MG543462       | GX30               | China   | 2015 |            | 3999 bp | 2019 bp | 1425 bp |
| MG543461       | GX29               | China   | 2015 |            | 3999 bp | 2019 bp | 1425 bp |
| MG543460       | GX28               | China   | 2015 |            | 3987 bp | 2019 bp | 1413 bp |
| MG543459       | GX6                | China   | 2015 |            | 3999 bp | 2019 bp | 1425 bp |
| MG543458       | GX5                | China   | 2015 |            | 3999 bp | 2019 bp | 1425 bp |
| MG543457       | GX3                | China   | 2015 |            | 3999 bp | 2019 bp | 1425 bp |
| MG543456       | GX2                | China   | 2015 |            | 3999 bp | 2019 bp | 1425 bp |
| MG696112       | FJLY2017           | China   | 2017 |            | 3588 bp | 2019 bp | 1401 bp |
| MG696111       | FJFZ2017           | China   | 2017 |            | 3588 bp | 2019 bp | 1401 bp |
| KU563733       | 42                 | USA     | 2015 |            | 4103 bp | 2019 bp | 1410 bp |
| KY996756       | GD-2014-1          | China   | 2014 |            | 3443 bp | 2019 bp | 1410 bp |
| KY996757       | GD-2014-2          | China   | 2014 |            | 3437 bp | 2019 bp | 1401 bp |
| KY996758       | GD-2014-3          | China   | 2014 |            | 3437 bp | 2019 bp | 1401 bp |
| MN515032       | BR_RSPPV7          | Brazil  | 2016 |            | 3727 bp | 2019 bp | 1425 bp |
| MG902949       | 37                 | China   | 2016 | tonsil     | 4013 bp | 2019 bp | 1425 bp |
| MK092496       | PPV7-JX38          | China   | 2015 | wild boar  | 3981 bp | 2019 bp | 1410 bp |
| MK092495       | PPV7-JX21          | China   | 2015 | wild boar  | 3973 bp | 2019 bp | 1401 bp |
| MK092494       | PPV7-JX15          | China   | 2015 | wild boar  | 3997 bp | 2019 bp | 1425 bp |
| MK092493       | PPV7-JX10          | China   | 2015 | wild boar  | 3982 bp | 2019 bp | 1401 bp |
| MK092492       | PPV7-DJH26         | China   | 2015 | wild boar  | 3982 bp | 2019 bp | 1410 bp |
| MK092491       | PPV7-DJH24         | China   | 2015 | wild boar  | 3997 bp | 2019 bp | 1425 bp |
| MK092490       | PPV7-DJH23         | China   | 2015 | wild boar  | 3997 bp | 2019 bp | 1425 bp |
| MK092489       | PPV7-DJH20         | China   | 2015 | wild boar  | 3982 bp | 2019 bp | 1410 bp |
| MK092488       | PPV7-DJH19         | China   | 2015 | wild boar  | 3982 bp | 2019 bp | 1410 bp |
| MK092487       | PPV7-DJH14         | China   | 2015 | wild boar  | 3982 bp | 2019 bp | 1410 bp |
| MK092486       | PPV7-DJH13         | China   | 2015 | wild boar  | 3994 bp | 2019 bp | 1422 bp |

|           |                |             |      |           |         |         |         |
|-----------|----------------|-------------|------|-----------|---------|---------|---------|
| MK092485  | PPV7-DJH12     | China       | 2015 | wild boar | 3973 bp | 2019 bp | 1401 bp |
| MK092484  | PPV7-DJH11     | China       | 2015 | wild boar | 3979 bp | 2016 bp | 1410 bp |
| MK092483  | PPV7-LB4       | China       | 2015 | wild boar | 3994 bp | 2019 bp | 1422 bp |
| MK092482  | PPV7-87-clone2 | China       | 2015 | wild boar | 3982 bp | 2019 bp | 1410 bp |
| MK092481  | PPV7-87-clone1 | China       | 2015 | wild boar | 3997 bp | 2019 bp | 1425 bp |
| MK092480  | PPV7-80        | China       | 2015 | wild boar | 3973 bp | 2019 bp | 1401 bp |
| MK092479  | PPV7-77        | China       | 2015 | wild boar | 3997 bp | 2019 bp | 1425 bp |
| MK092478  | PPV7-60        | China       | 2015 | wild boar | 3997 bp | 2019 bp | 1425 bp |
| MK092477  | PPV7-55        | China       | 2015 | wild boar | 3973 bp | 2019 bp | 1401 bp |
| NC_040562 | GX49           | China       | 2015 |           | 3999 bp | 2019 bp | 1425 bp |
| MH817777  | N133           | South Korea | 2018 |           | 3446 bp | 2019 bp | 1410 bp |
| MH817776  | N141           | South Korea | 2018 |           | 3446 bp | 2019 bp | 1410 bp |

---

**Table S2.** Detailed information of reference *Parvoviridae* sequences used in this study.

| Sub-family Parvovirinae (genus) | Genbank Number | Strain Name                   | Country   | Host                   | Year |
|---------------------------------|----------------|-------------------------------|-----------|------------------------|------|
| <i>Tetraparvovirus</i>          | JF738362       | PHoV-WB2010-681               | Romania   | Wild boar              | 2010 |
|                                 | KU167028       | PPV3-GX1                      | China     | Swine                  |      |
|                                 | MK378231       | PPV3_VIRES_GX03_C1            | China     | Sus scrofa             | 2017 |
|                                 | EU200677       | PHoV-HK7                      | China     |                        |      |
|                                 | JQ037753       | Eidolon helvum parvovirus 1   | Ghana     | Eidolon helvum         |      |
|                                 | AB076669       | PPV2-H-1                      | Myanmar   | Swine                  |      |
|                                 | GU938299       | PPV2-CnPPV_YW8                | China     | Swine                  | 2009 |
|                                 | JX101461       | PPV2-US-135                   | USA       | Pig                    | 2011 |
| <i>Copiparvovirus</i>           | AF406966       | Bovine parvovirus 2           |           |                        |      |
|                                 | KR709268       | PPV6-KSU7-SD-2014             | USA       | Swine                  | 2014 |
|                                 | KX384820       | PPV6-K17-10                   | Poland    | Swine                  |      |
|                                 | KF999685       | PPV6-TJ                       | China     | Swine                  | 2012 |
|                                 | GU978964       | PPV4-HEN0922-5400             | China     | Swine                  | 2009 |
|                                 | HM031134       | PPV4-JS0918a                  | China     | Swine                  | 2009 |
|                                 | JX896322       | PPV5-ND564                    | USA       | Swine                  | 2011 |
|                                 | KF661535       | PPV5-HN01                     | China     | Swine                  | 2013 |
| <i>Erythroparvovirus</i>        | NC_004295      | Human erythrovirus V9         |           | Homo sapiens           |      |
|                                 | NC_000883      | Human parvovirus B19          |           | Homo sapiens           |      |
| <i>Dependoparvovirus</i>        | AF063497       | Adeno-associated virus 1      |           |                        |      |
|                                 | JF333590       | Goose parvovirus SH           | China     | Anser anser            | 2009 |
| <i>Aveparvovirus</i>            | AY388617       | Bovine adeno-associated virus |           |                        |      |
|                                 | GU214704       | Chicken parvovirus ABU-P1     | Hungary   |                        |      |
| <i>Bocaparvovirus</i>           | JF429834       | Porcine bocavirus 3 SH20F     | Hong Kong | Pig                    | 2007 |
|                                 | JF429836       | Porcine bocavirus 4 SH17N-2   | Hong Kong | Pig                    | 2007 |
|                                 | DQ000496       | Primate bocaparvovirus 1 st2  |           |                        |      |
|                                 | HM053693       | Porcine bocavirus 1           | China     | Pig                    | 2006 |
|                                 | HM053694       | Porcine bocavirus 2           | China     | Pig                    | 2006 |
| <i>Amdoparvovirus</i>           | NC_001662      | Aleutian mink disease virus   |           |                        |      |
| <i>Protoparvovirus</i>          | DQ196317       | Minute virus of mice          |           |                        |      |
|                                 | M19296         | Canine parvovirus             |           | Norden dog kidney cell |      |

NC\_001718  
U44978

PPV1-NADL-2  
PPV1-Kresse

---

**Table S3.** Identified linear B cell epitopes in PPV1 Cap deposited in IEDB database.

| Epitope ID | Sequence                  | Start | End | Epitope Region |
|------------|---------------------------|-------|-----|----------------|
| 104132     | MSENVEQHNPINAGT           | 1     | 15  |                |
| 104327     | VEQHNPINAGTELSAT          | 5     | 20  |                |
| 103886     | EQHNPINAGTELSAT           | 6     | 20  |                |
| 104205     | QHNPINAGTELSATG           | 7     | 21  |                |
| 103972     | HNPINAGTELSATGN           | 8     | 22  | A (1-39)       |
| 104175     | PINAGTELSATGNESG          | 10    | 25  |                |
| 103792     | AGTELSATGNESGGG           | 13    | 27  |                |
| 104299     | TELSATGNESGGGGGGGGGRGAGGV | 15    | 39  |                |
| 103942     | GNESGGGGGGGGG             | 21    | 33  |                |
| 103986     | IHVLNSESGSAGQMVQD         | 83    | 99  | B (83-99)      |
| 104161     | NVVLTITESTSPT             | 147   | 162 | C (147-162)    |
| 103853     | DLTASLMVALDTNNT           | 168   | 182 | D (168-182)    |
| 103947     | GQSQQITDSIQTGLH           | 225   | 239 |                |
| 461857     | QQITDA                    | 228   | 233 |                |
| 104036     | LHSDIMFYTIENAVPIHLL       | 238   | 256 | E (225-263)    |
| 104369     | YTIENAVPIHLLRTGDEFS       | 245   | 263 |                |
| 461874     | RSLGLPPK                  | 284   | 291 |                |
| 104049     | LPPKLLTEPTTEGDQHPGT       | 288   | 306 |                |
| 104057     | LTEPTTEGDQHPGTLPAANT      | 293   | 312 |                |
| 104165     | PAANTRKGYHQTMNNSY         | 308   | 326 |                |
| 104314     | TRKGYHQTMNNSY             | 312   | 324 | F (284-361)    |
| 104298     | TEATAIRPAQVGYNT           | 325   | 339 |                |
| 104295     | TAIRPAQVGYNTPYMF          | 328   | 344 |                |
| 461776     | FEYSNGGPFLLPI             | 344   | 356 |                |
| 104367     | YSNGGPFLLPIVPTAD          | 346   | 361 |                |
| 104362     | YNDDEPNGAIRFTMG           | 364   | 378 |                |
| 104143     | NDDEPNGAIRFTMGYQHQQ       | 365   | 383 |                |
| 103842     | DEPNGAIRFTMGYQH           | 367   | 381 |                |
| 104147     | NGAIRFTMGYQHQQ            | 370   | 383 | G (364-399)    |
| 104310     | TMGYQHQQQLTSS             | 376   | 388 |                |
| 104202     | QHGHLLTSSQELERYTFNP       | 380   | 398 |                |
| 104319     | TTSSQELERYTFNPQ           | 385   | 399 |                |
| 104213     | QQFNQQAPLNLENTNNGTL       | 408   | 426 |                |
| 104051     | LPSPDPIGGKSNMHFMNTL       | 427   | 444 | H (408-453)    |
| 104152     | NMHFMNTLNLYGPLTAL         | 437   | 453 |                |

**Table S4.** CD8 T cell epitopes prediction of PPV7 Cap.

| Allele     | Start | End | Length | Peptide   | Percentile Rank | Vaxijen 2.0 Score |
|------------|-------|-----|--------|-----------|-----------------|-------------------|
| SLA-2*0401 | 111   | 119 | 9      | YETGYHNWY | 1.76            | 0.5659            |
| SLA-3*0401 | 166   | 174 | 9      | TAPETNWTW | 0.31            | 1.4351            |
| SLA-3*0401 | 168   | 176 | 9      | PETNWTWTW | 0.74            | 1.419             |
| SLA-3*0401 | 170   | 178 | 9      | TNWTWTWNT | 0.28            | 1.2242            |
| SLA-3*0401 | 220   | 228 | 9      | RPGKNAMSF | 1.05            | 0.5339            |
| SLA-3*0401 | 224   | 232 | 9      | NAMSFHWKT | 1.65            | 1.5461            |
| SLA-3*0401 | 384   | 392 | 9      | KRRSRMF   | 0.31            | 0.5991            |
| SLA-3*0401 | 385   | 393 | 9      | KRRSRMFAP | 0.26            | 1.2953            |
| SLA-3*0401 | 386   | 394 | 9      | RRSRMFAPT | 1.36            | 0.9148            |
| SLA-2*0401 | 409   | 417 | 9      | AFVLPTVRY | 0.85            | 0.7382            |
| SLA-3*0401 | 423   | 431 | 9      | RRSQARTR  | 1.1             | 0.6504            |
| SLA-2*0401 | 445   | 453 | 9      | WNPYMTGTY | 1.22            | 1.2177            |

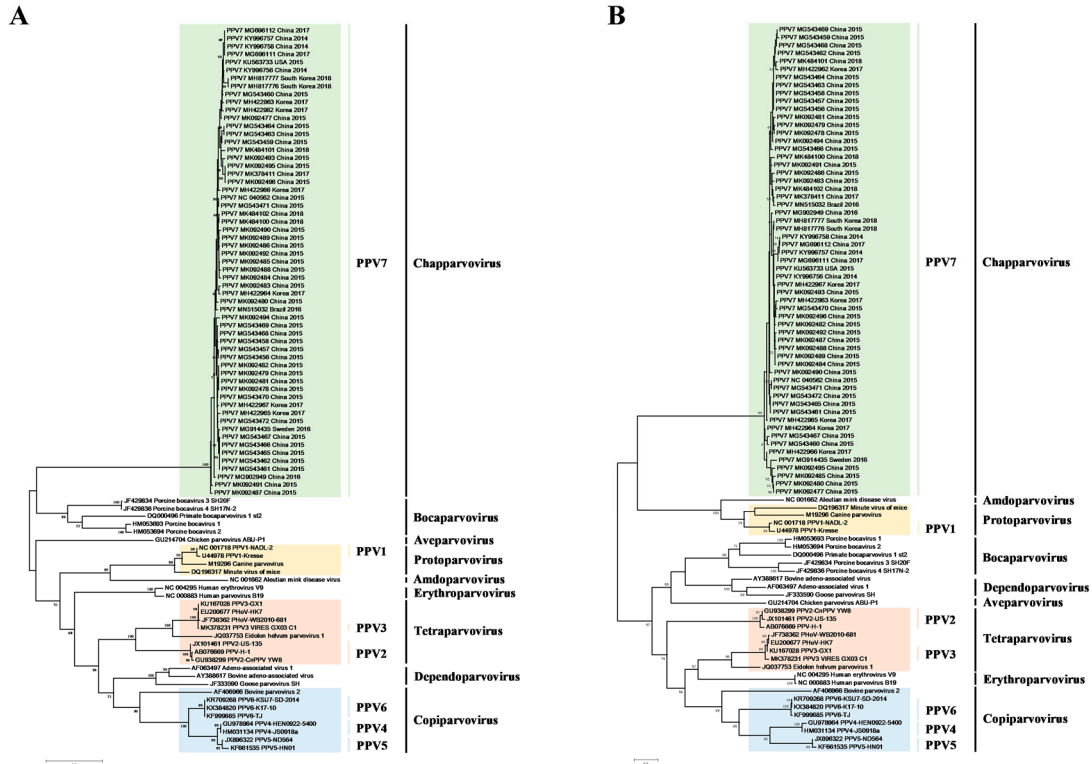

**Figure S1.** Phylogenetic analysis of viruses in the *Parvoviridae* family. Trees were constructed based on the NS1 (A) and Cap (B) amino acid sequences by the Maximum-likelihood (ML) phylogenetic method using Jones-Taylor-Thornton (JTT) model with 1000 bootstrap replicates and bootstrap > 50%.

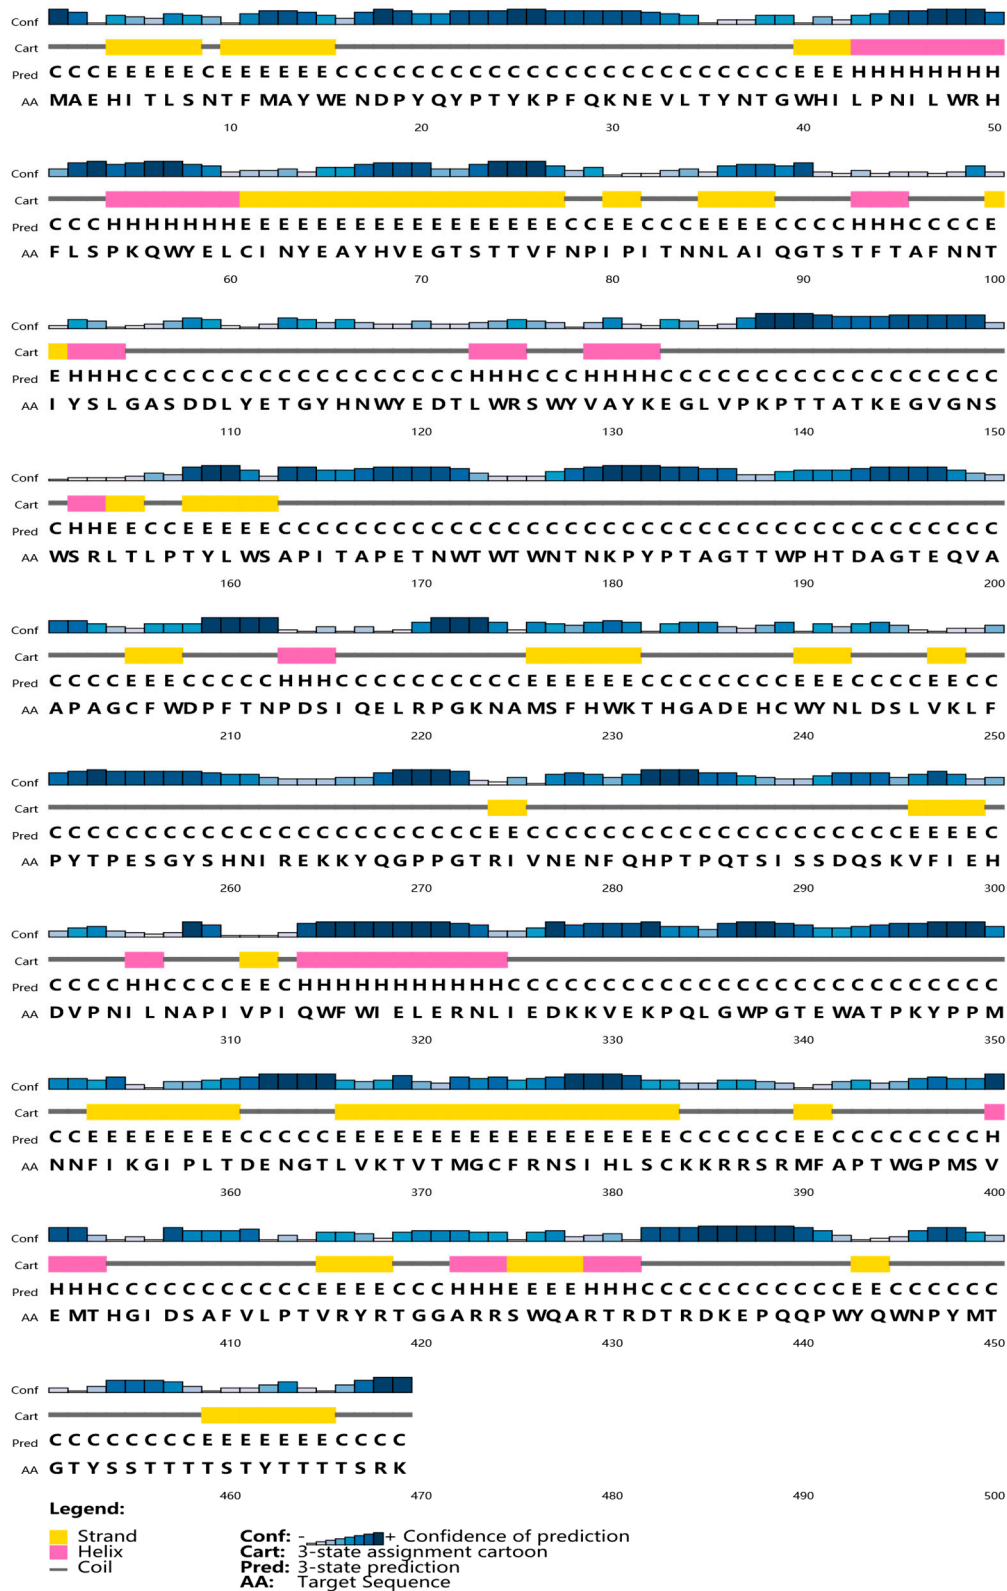

**Figure S2.** Secondary structure analysis of PPV7 Cap via PSIPRED. Helix, strand and random coil regions are shown as pink, yellow and black, respectively.

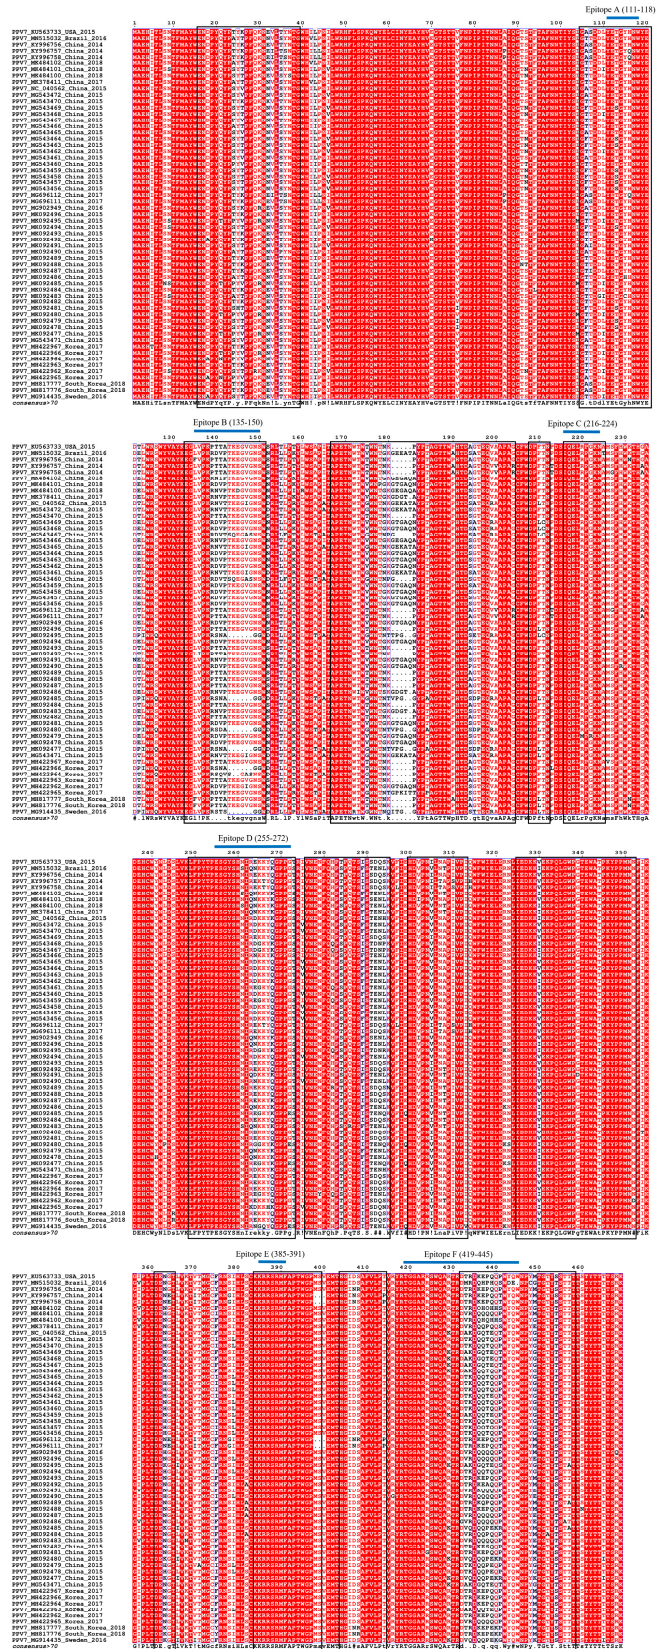

**Figure S3.** Sequence alignment of PPV7 Cap. All loops were labelled with black rectangles according to the secondary structure prediction. The 6 predicted linear B cell epitopes were labelled with blue lines.



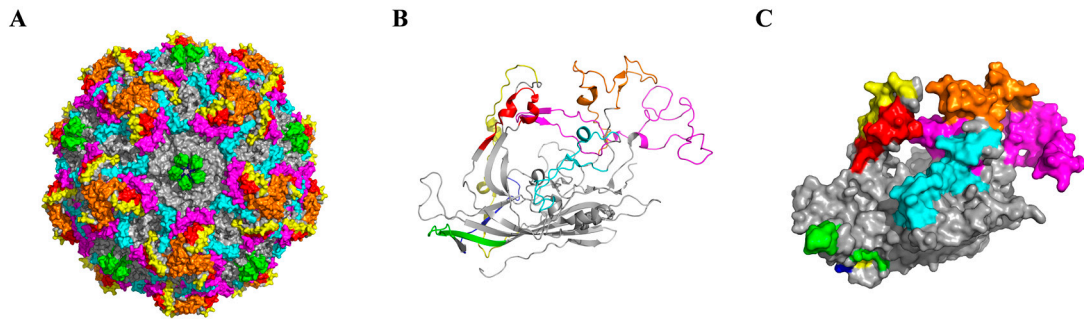

**Figure S4.** Mapping the location of identified PPV1 B cell epitope regions on 3D structure (PDB ID: 1K3V) of capsid (A) and Cap monomer (B and C). Note: (region B: red, region C: green, region D: blue, region E: yellow, region F: magenta, region G: cyan and region H: orange).

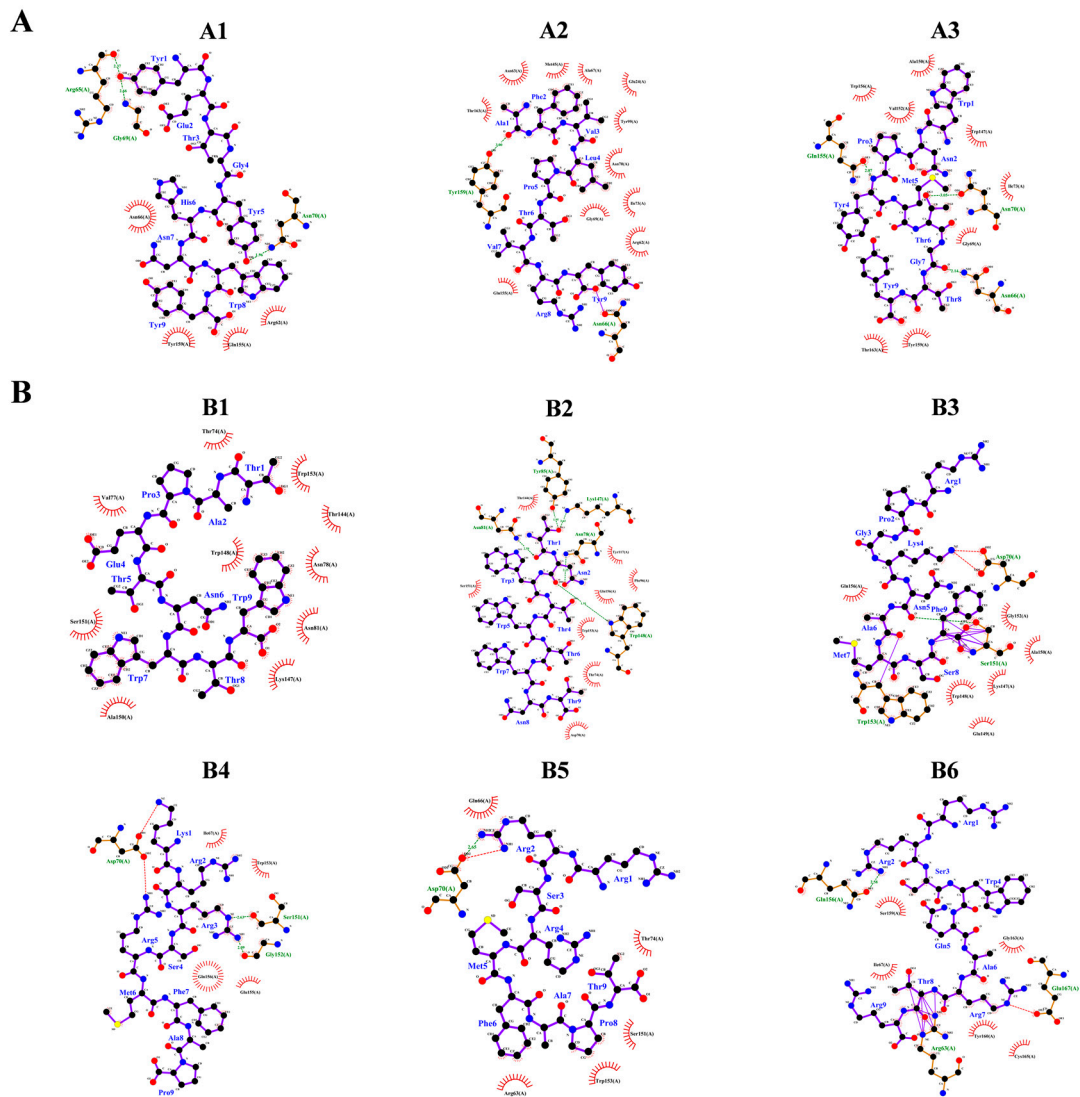

**Figure S5.** 2D graphical representation of molecular interaction analysis of MHC class-I alleles binding peptides to SLA-2\*0402 (A) and SLA-3\*0401 (B) protein. The figure is in symmetry with the information provided in Table 4 and Figure 5 and showing residues interacting with strong hydrogen bonding.
